# Supplementary material
Source: PubMed Central journal article supplement (PMC8821136)
Supplement: NIHMS1761841-supplement-supinfo.pdf [file NIHMS1761841-supplement-supinfo.pdf]

## **Supplementary Appendix S1: Key search terms**

Aged; geriatrics; aging; nursing home patient; phase 4 clinical trial; multicenter study; controlled clinical trial; clinical trial; adaptive clinical trial; community trial; intervention study; longitudinal study; postmarketing surveillance; prospective study; retrospective study; meta-analysis; case control study; observational study; cohort analysis; major clinical study; controlled study; medication compliance; drug safety; inappropriate prescribing; drug utilization review; deprescription; polypharmacy; medication therapy management; medication adherence monitoring system; medication error; pharmacoepidemiology; adverse event; adverse drug reaction; major adverse cardiac event; major adverse cardiac event; medication related problem; drug related problem; lack of drug effect; prescription drug misuse; drug dose intensification; drug dose reduction; optimal drug dose

## **Supplementary Appendix S2: List of journals manually searched**

We performed a manual search for relevant articles from high impact journals under the categories of:

(1) General and Internal Medicine:

- New England Journal of Medicine
- Journal of the American Medical Association (JAMA Intern Med)

(2) Geriatrics and Gerontology:

- Journal of the American Medical Director Association
- Journal of Gerontology: Medical Sciences
- Age and Ageing
- Journal of the American Geriatrics Society

(3) Pharmacology and Pharmacy:

- British Journal of Clinical Pharmacology

## **Supplementary Appendix S3: List of 2020 articles that addressed medication use quality and safety**

Articles in bold have been selected as the four top articles that have been discussed in the special article.

### **Medication Safety/Adverse Drug Events (ADEs)**

#### **A. Cardiovascular**

1. Alqdwah-Fattouh R, Rodríguez-Martín S, de Abajo FJ, et al. Differential effects of antidepressant subgroups on risk of acute myocardial infarction: A nested case-control study. *Br J Clin Pharmacol.* 2020;**86**: 2040-2050.
2. Biffi A, Rea F, Scotti L, et al. Antidepressants and the Risk of Cardiovascular Events in Elderly Affected by Cardiovascular Disease: A Real-Life Investigation From Italy. *J Clin Psychopharmacol.* 2020;**40**: 112-121.

#### **B. Cognitive decline/Dementia**

1. Hughes D, Judge C, Murphy R, et al. Association of Blood Pressure Lowering With Incident Dementia or Cognitive Impairment: A Systematic Review and Meta-analysis. *JAMA.* 2020;**323**: 1934-1944.
2. Dyer AH, Murphy C, Segurado R, Lawlor B, Kennelly SP. Is Ongoing Anticholinergic Burden Associated With Greater Cognitive Decline and Dementia Severity in Mild to Moderate Alzheimer's Disease? *J Gerontol A Biol Sci Med Sci.* 2020;**75**: 987-994.
3. Neelamegam M, Zgibor J, Chen H, et al. The Effect of Cumulative Anticholinergic Use on the Cognitive Function of Older Adults: Results from the Personality and

Total Health (PATH) Through Life Study. *J Gerontol A Biol Sci Med Sci.* 2020;**75**: 1706-1714.

4. Pieper NT, Grossi CM, Chan WY, et al. Anticholinergic drugs and incident dementia, mild cognitive impairment and cognitive decline: a meta-analysis. *Age Ageing.* 2020;**49**: 939-947.
5. Weigand AJ, Bondi MW, Thomas KR, et al. Association of anticholinergic medications and AD biomarkers with incidence of MCI among cognitively normal older adults. *Neurology.* 2020;**95**: e2295-e2304.

### **C. Falls/fractures**

1. **Wei J, Lane NE, Bolster MB, et al. Association of Tramadol Use With Risk of Hip Fracture. *J Bone Miner Res.* 2020;**35**: 631-640.**
2. **Black DM, Geiger EJ, Eastell R, et al. Atypical Femur Fracture Risk versus Fragility Fracture Prevention with Bisphosphonates. *N Engl J Med.* 2020;**383**: 743-753.**
3. Lutsey PL, Norby FL, Ensrud KE, et al. Association of Anticoagulant Therapy With Risk of Fracture Among Patients With Atrial Fibrillation. *JAMA Intern Med.* 2020;**180**: 245-253.
4. Gray SL, Marcum ZA, Dublin S, et al. Association Between Medications Acting on the Central Nervous System and Fall-Related Injuries in Community-Dwelling Older Adults: A New User Cohort Study. *J Gerontol A Biol Sci Med Sci.* 2020;**75**: 1003-1009.
5. Bokrantz T, Schiöler L, Boström KB, et al. Antihypertensive drug classes and the risk of hip fracture: results from the Swedish primary care cardiovascular database. *J Hypertens.* 2020;**38**: 167-175.

6. Carrier H, Cortaredona S, Philipps V, et al. Long-term risk of hip or forearm fractures in older occasional users of benzodiazepines. *Br J Clin Pharmacol.* 2020;**86**: 2155-2164.
7. Chen YJ, Kung PT, Chou WY, Tsai WC. Alendronate medication possession ratio and the risk of second hip fracture: an 11-year population-based cohort study in Taiwan. *Osteoporos Int.* 2020;**31**: 1555-1563.
8. Ogunwale AN, Colon-Emeric CS, Sloane R, Adler RA, Lyles KW, Lee RH. Acetylcholinesterase Inhibitors Are Associated with Reduced Fracture Risk among Older Veterans with Dementia. *J Bone Miner Res.* 2020;**35**: 440-445.
9. Yoshikawa A, Ramirez G, Smith ML, et al. Opioid Use and the Risk of Falls, Fall Injuries and Fractures among Older Adults: A Systematic Review and Meta-Analysis. *J Gerontol A Biol Sci Med Sci.* 2020;**75**: 1989-1995.
10. Won DY, Byun SJ, Jeong JS, Shin JY. Association Between Acetylcholinesterase Inhibitors and Osteoporotic Fractures in Older Persons With Alzheimer's Disease. *J Am Med Dir Assoc.* 2020;**21**: 1128-1133.e1121.

#### **D. Mortality**

1. Chlebowski RT, Anderson GL, Aragaki AK, et al. Association of Menopausal Hormone Therapy With Breast Cancer Incidence and Mortality During Long-term Follow-up of the Women's Health Initiative Randomized Clinical Trials. *JAMA.* 2020;**324**: 369-380.
2. Basciotta M, Zhou W, Ngo L, Donnino M, Marcantonio ER, Herzig SJ. Antipsychotics and the Risk of Mortality or Cardiopulmonary Arrest in Hospitalized Adults. *J Am Geriatr Soc.* 2020;**68**: 544-550.

#### **E. Other**

1. Savage RD, Visentin JD, Bronskill S, et al. Evaluation of a Common Prescribing Cascade of Calcium Channel Blockers and Diuretics in Older Adults With Hypertension. *JAMA Intern Med.* 2020;**180**: 643-651.
2. Hodkinson A, Tyler N, Ashcroft DM, et al. Preventable medication harm across health care settings: a systematic review and meta-analysis. *BMC Med.* 2020;**18**: 313.
3. Hill K, Sucha E, Rhodes E, et al. Risk of Hospitalization With Hemorrhage Among Older Adults Taking Clarithromycin vs Azithromycin and Direct Oral Anticoagulants. *JAMA Intern Med.* 2020;**180**: 1052-1060.
4. Nicolau JC, Bhatt DL, Hohnloser SH, et al. Dabigatran Dual Therapy vs Warfarin Triple Therapy Post-Percutaneous Coronary Intervention in Patients with Atrial Fibrillation With/Without a Proton Pump Inhibitor: A Pre-Specified Analysis of the RE-DUAL PCI Trial. *Drugs.* 2020;**80**: 995-1005.
5. Ohnuma T, Raghunathan K, Moore S, et al. Dose-Dependent Association of Gabapentinoids with Pulmonary Complications After Total Hip and Knee Arthroplasties. *J Bone Joint Surg Am.* 2020;**102**: 221-229.
6. Tapiainen V, Lavikainen P, Koponen M, et al. The Risk of Head Injuries Associated With Antipsychotic Use Among Persons With Alzheimer's disease. *J Am Geriatr Soc.* 2020;**68**: 595-602.
7. Tecklenborg S, Byrne C, Cahir C, Brown L, Bennett K. Interventions to Reduce Adverse Drug Event-Related Outcomes in Older Adults: A Systematic Review and Meta-analysis. *Drugs Aging.* 2020;**37**: 91-98.
8. Zullo AR, Ofori-Asenso R, Wood M, et al. Effects of Statins for Secondary Prevention on Functioning and Other Outcomes Among Nursing Home Residents. *J Am Med Dir Assoc.* 2020;**21**: 500-507.e508.

## Deprescribing/Discontinuation

1. Sheppard JP, Burt J, Lown M, et al. Effect of Antihypertensive Medication Reduction vs Usual Care on Short-term Blood Pressure Control in Patients With Hypertension Aged 80 Years and Older: The OPTIMISE Randomized Clinical Trial. *JAMA*. 2020;**323**: 2039-2051.
2. Niznik JD, Zhao X, He M, et al. Risk for Health Events After Deprescribing Acetylcholinesterase Inhibitors in Nursing Home Residents With Severe Dementia. *J Am Geriatr Soc*. 2020;**68**: 699-707.
3. Niznik JD, Hunnicutt JN, Zhao X, et al. Deintensification of Diabetes Medications among Veterans at the End of Life in VA Nursing Homes. *J Am Geriatr Soc*. 2020;**68**: 736-745.
4. Curtin D, Jennings E, Daunt R, et al. Deprescribing in Older People Approaching End of Life: A Randomized Controlled Trial Using STOPPFrail Criteria. *J Am Geriatr Soc*. 2020;**68**: 762-769.
5. Evrard P, Henrard S, Foulon V, Spinewine A. Benzodiazepine Use and Deprescribing in Belgian Nursing Homes: Results from the COME-ON Study. *J Am Geriatr Soc*. 2020;**68**: 2768-2777.
6. Niznik JD, Zhao X, He M, et al. Impact of deprescribing AChEIs on aggressive behaviors and antipsychotic prescribing. *Alzheimers Dement*. 2020;**16**: 630-640.
7. Rashid R, Chang C, Niu F, et al. Evaluation of a Pharmacist-Managed Nonsteroidal Anti-Inflammatory Drugs Deprescribing Program in an Integrated Health Care System. *J Manag Care Spec Pharm*. 2020;**26**: 918-924.
8. Springer SP, Mor MK, Sileanu F, et al. Incidence and Predictors of Aspirin Discontinuation in Older Adult Veteran Nursing Home Residents at End of Life. *J Am Geriatr Soc*. 2020;**68**: 725-735.

9. Thorpe CT, Sileanu FE, Mor MK, et al. Discontinuation of Statins in Veterans Admitted to Nursing Homes near the End of Life. *J Am Geriatr Soc.* 2020;**68**: 2609-2619.
10. Zechmann S, Senn O, Valeri F, et al. Effect of a patient-centred deprescribing procedure in older multimorbid patients in Swiss primary care - A cluster-randomised clinical trial. *BMC Geriatr.* 2020;**20**: 471.

### **Medication adherence**

1. Fanaroff AC, Peterson ED, Kaltenbach LA, et al. Association of a P2Y12 Inhibitor Copayment Reduction Intervention With Persistence and Adherence With Other Secondary Prevention Medications: A Post Hoc Analysis of the ARTEMIS Cluster-Randomized Clinical Trial. *JAMA Cardiol.* 2020;**5**: 38-46.
2. Cross AJ, Elliott RA, Petrie K, Kuruvilla L, George J. Interventions for improving medication-taking ability and adherence in older adults prescribed multiple medications. *Cochrane Database Syst Rev.* 2020;**5**: Cd012419.
3. Jackson LR, Kim S, Blanco R, et al. Discontinuation rates of warfarin versus direct acting oral anticoagulants in US clinical practice: Results from Outcomes Registry for Better Informed Treatment of Atrial Fibrillation II (ORBIT-AF II). *Am Heart J.* 2020;**226**: 85-93.

### **Medication Use Trends**

1. Secnik J, Xu H, Schwertner E, et al. Dementia Diagnosis Is Associated with Changes in Antidiabetic Drug Prescription: An Open-Cohort Study of ~130,000 Swedish Subjects over 14 Years. *J Alzheimers Dis.* 2020;**76**: 1581-1594.



## **Suboptimal Prescribing**

### **A. PIMs/low-value medications**

1. Hirdes JP, Major J, Didic S, et al. A Canadian Cohort Study to Evaluate the Outcomes Associated with a Multicenter Initiative to Reduce Antipsychotic Use in Long-Term Care Homes. *J Am Med Dir Assoc.* 2020;**21**: 817-822.
2. Weir DL, Lee TC, McDonald EG, et al. Both New and Chronic Potentially Inappropriate Medications Continued at Hospital Discharge Are Associated With Increased Risk of Adverse Events. *J Am Geriatr Soc.* 2020;**68**: 1184-1192.
3. Liew TM, Lee CS, Goh SKL, Chang ZY. The prevalence and impact of potentially inappropriate prescribing among older persons in primary care settings: multilevel meta-analysis. *Age Ageing.* 2020;**49**: 570-579.

### **B. Underuse**

1. Romanelli RJ, Ito MK, Karalis DG, et al. Statin utilization and low-density lipoprotein cholesterol in statin-treated patients with atherosclerotic cardiovascular disease: Trends from a community-based health care delivery system, 2002-2016. *J Clin Lipidol.* 2020;**14**: 305-314.

## **Optimizing Medication Use**

1. Rieckert A, Reeves D, Altiner A, et al. Use of an electronic decision support tool to reduce polypharmacy in elderly people with chronic diseases: cluster randomised controlled trial. *BMJ*. 2020;**369**: m1822.
2. Romskaug R, Skovlund E, Straand J, et al. Effect of Clinical Geriatric Assessments and Collaborative Medication Reviews by Geriatrician and Family Physician for Improving Health-Related Quality of Life in Home-Dwelling Older Patients Receiving Polypharmacy: A Cluster Randomized Clinical Trial. *JAMA Intern Med*. 2020;**180**: 181-189.
3. **Nace DA, Hanlon JT, Crnich CJ, et al. A Multifaceted Antimicrobial Stewardship Program for the Treatment of Uncomplicated Cystitis in Nursing Home Residents. *JAMA Intern Med*. 2020;**180**: 944-951.**
4. Sloane PD, Zimmerman S, Ward K, et al. A 2-Year Pragmatic Trial of Antibiotic Stewardship in 27 Community Nursing Homes. *J Am Geriatr Soc*. 2020;**68**: 46-54.
5. Sluggett JK, Chen EYH, Ilomäki J, et al. Reducing the Burden of Complex Medication Regimens: Simplification of Medications Prescribed to Long-term care Residents (SIMPLER) Cluster Randomized Controlled Trial. *J Am Med Dir Assoc*. 2020;**21**: 1114-1120.e1114.
6. Sluggett JK, Hopkins RE, Chen EY, et al. Impact of Medication Regimen Simplification on Medication Administration Times and Health Outcomes in Residential Aged Care: 12 Month Follow Up of the SIMPLER Randomized Controlled Trial. *J Clin Med*. 2020;**9**:1053.
7. O'Mahony D, Gudmundsson A, Soiza R. L, et al. Prevention of adverse drug reactions in hospitalized older patients with multi-morbidity and polypharmacy: the SENATOR\* randomized controlled clinical trial. *Age Ageing*. 2020;**49**: 605-614.

8. Abbott RA, Moore DA, Rogers M, Bethel A, Stein K, Coon JT. Effectiveness of pharmacist home visits for individuals at risk of medication-related problems: a systematic review and meta-analysis of randomised controlled trials. *BMC Health Serv Res.* 2020;**20**: 39.
9. Almutairi H, Stafford A, Etherton-Beer C, Flicker L. Optimisation of medications used in residential aged care facilities: a systematic review and meta-analysis of randomised controlled trials. *BMC Geriatr.* 2020;**20**: 236.
10. Kirkham J, Maxwell C, Velkers C, Leung R, Moffat K, Seitz D. Optimizing Prescribing of Antipsychotics in Long-Term Care (OPAL): A Stepped-Wedge Trial. *J Am Med Dir Assoc.* 2020;**21**: 381-387.e383.
11. Martinez AI, Abner EL, Jicha GA, et al. One-Year Evaluation of a Targeted Medication Therapy Management Intervention for Older Adults. *J Manag Care Spec Pharm.* 2020;**26**: 520-528.

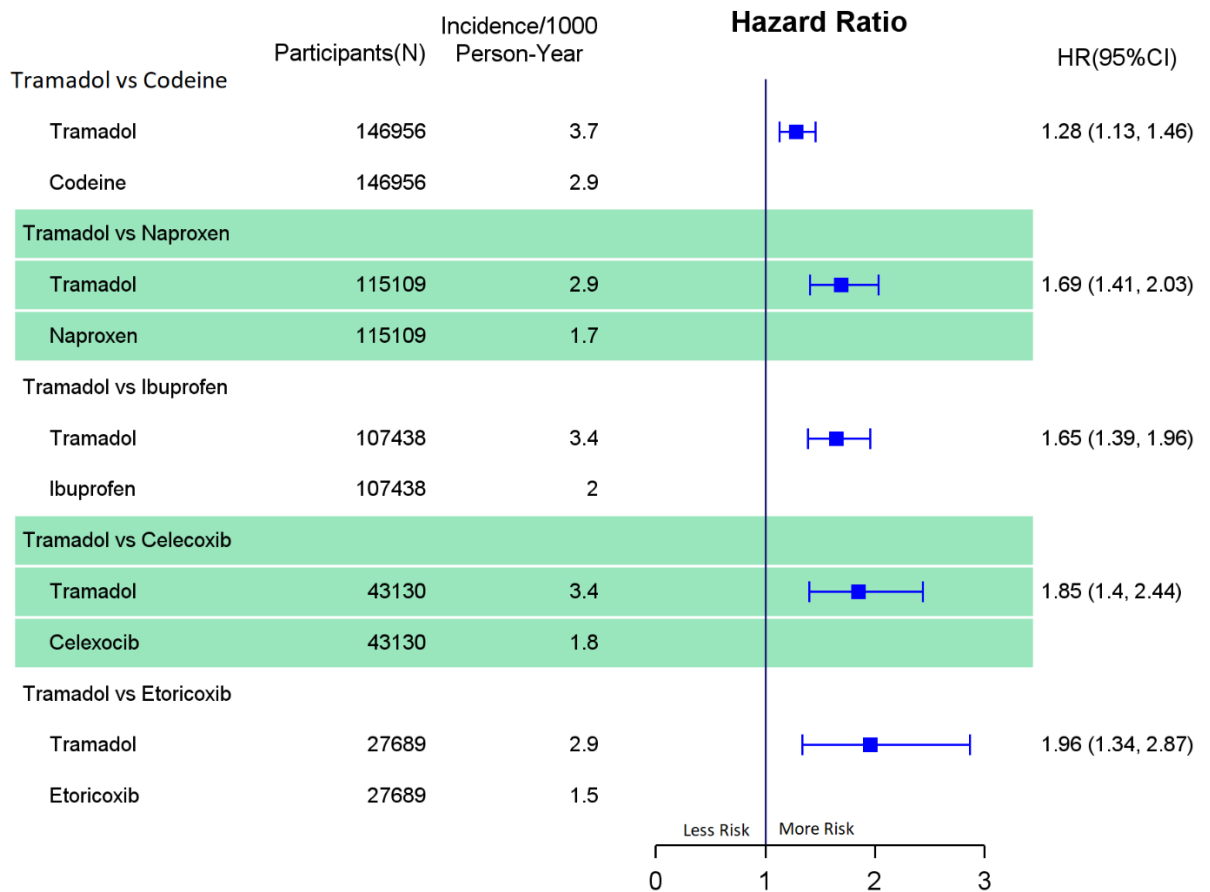

**Supplemental Figure S1. Forest plot of hazard ratios for the association between tramadol use with risk of hip fracture. HRs and 95% CIs are from five separate cause-specific Cox proportional hazard models. HR, hazard ratio; CI, confidence interval. <sup>17</sup>**
